# Supplementary material
Source: ML conference proceedings conference paper supplement (https://proceedings.neurips.cc/paper_files/paper/2020/hash/f5496252609c43eb8a3d147ab9b9c006-Abstract.html)
Supplement: Supplementary file [file f5496252609c43eb8a3d147ab9b9c006-Supplemental.pdf]

# Supplementary Material:

## Energy-based Out-of-distribution Detection

### A Detailed Experimental Results

We report the performance of OOD detectors on each of the six OOD test datasets in Table 4 (CIFAR-10) and Table 5 (CIFAR-100).

| Dataset                    |                           | FPR95       | AUROC        | AUPR         |
|----------------------------|---------------------------|-------------|--------------|--------------|
| $\mathcal{D}_{out}^{test}$ |                           | ↓           | ↑            | ↑            |
| <b>Texture</b>             | Softmax score [14]        | 59.28       | 88.50        | 97.16        |
|                            | Energy score (ours)       | 52.79       | 85.22        | 95.41        |
|                            | ODIN [24]                 | 49.12       | 84.97        | 95.28        |
|                            | Mahalanobis [23]          | 15.00       | 97.33        | 99.41        |
|                            | OE [15]                   | 12.94       | 97.73        | 99.52        |
|                            | Energy fine-tuning (ours) | <b>5.34</b> | <b>98.56</b> | <b>99.68</b> |
| <b>SVHN</b>                | Softmax score [14]        | 48.49       | 91.89        | 98.27        |
|                            | Energy score (ours)       | 35.59       | 90.96        | 97.64        |
|                            | ODIN [24]                 | 33.55       | 91.96        | 98.00        |
|                            | Mahalanobis [23]          | 12.89       | 97.62        | 99.47        |
|                            | OE [15]                   | 4.36        | 98.63        | 99.74        |
|                            | Energy fine-tuning (ours) | <b>1.04</b> | <b>99.41</b> | <b>99.89</b> |
| <b>Places365</b>           | Softmax score [14]        | 59.48       | 88.20        | 97.10        |
|                            | Energy score (ours)       | 40.14       | 89.89        | 97.30        |
|                            | ODIN [24]                 | 57.40       | 84.49        | 95.82        |
|                            | Mahalanobis [23]          | 68.57       | 84.61        | 96.20        |
|                            | OE [15]                   | 19.07       | 96.16        | 99.06        |
|                            | Energy fine-tuning (ours) | <b>9.00</b> | <b>97.48</b> | <b>99.35</b> |
| <b>LSUN-C</b>              | Softmax score [14]        | 30.80       | 95.65        | 99.13        |
|                            | Energy score (ours)       | 8.26        | 98.35        | 99.66        |
|                            | ODIN [24]                 | 15.52       | 97.04        | 99.33        |
|                            | Mahalanobis [23]          | 39.22       | 94.15        | 98.81        |
|                            | OE [15]                   | 2.89        | <b>99.49</b> | <b>99.90</b> |
|                            | Energy fine-tuning (ours) | <b>1.67</b> | 99.32        | 99.86        |
| <b>LSUN Resize</b>         | Softmax score [14]        | 52.15       | 91.37        | 98.12        |
|                            | Energy score (ours)       | 27.58       | 94.24        | 98.67        |
|                            | ODIN [24]                 | 26.62       | 94.57        | 98.77        |
|                            | Mahalanobis [23]          | 42.62       | 93.23        | 98.60        |
|                            | OE [15]                   | 5.59        | 98.94        | 99.79        |
|                            | Energy fine-tuning (ours) | <b>1.25</b> | <b>99.39</b> | <b>99.88</b> |
| <b>iSUN</b>                | Softmax score [14]        | 56.03       | 89.83        | 97.74        |
|                            | Energy score (ours)       | 33.68       | 92.62        | 98.27        |
|                            | ODIN [24]                 | 32.05       | 93.50        | 98.54        |
|                            | Mahalanobis [23]          | 44.18       | 92.66        | 98.45        |
|                            | OE [15]                   | 6.32        | 98.85        | 99.77        |
|                            | Energy fine-tuning (ours) | <b>1.60</b> | <b>99.33</b> | <b>99.87</b> |

Table 4: OOD Detection performance of CIFAR-10 as in-distribution for each OOD test dataset. The Mahalanobis score is calculated using the features of the second-to-last layer. **Bold** numbers are superior results.

### B Details of Experiments

**Software and Hardware.** We run all experiments with PyTorch and NVIDIA Tesla V100 DGXS GPUs.

**Number of Evaluation Runs.** We fine-tune the models once with a fixed random seed. Following OE [15], reported performance for each OOD dataset is averaged over 10 random batches of samples.

**Average Runtime** On a single GPU, the running time for energy fine-tuning is around 6 minutes; each training epoch takes 34 seconds. The evaluation time for all six OOD datasets is approximately 4 minutes.

| Dataset                                  |                           | FPR95        | AUROC        | AUPR         |
|------------------------------------------|---------------------------|--------------|--------------|--------------|
| $\mathcal{D}_{\text{out}}^{\text{test}}$ |                           | ↓            | ↑            | ↑            |
| <b>Texture</b>                           | Softmax score [14]        | 83.29        | 73.34        | 92.89        |
|                                          | Energy score (ours)       | 79.41        | 76.28        | 93.63        |
|                                          | ODIN [24]                 | 79.27        | 73.45        | 92.75        |
|                                          | Mahalanobis [23]          | <b>39.39</b> | <b>90.57</b> | <b>97.74</b> |
|                                          | OE [15]                   | 61.11        | 84.56        | 96.19        |
|                                          | Energy fine-tuning (ours) | 57.01        | 87.40        | 96.95        |
| <b>SVHN</b>                              | Softmax score [14]        | 84.59        | 71.44        | 92.93        |
|                                          | Energy score (ours)       | 85.82        | 73.99        | 93.65        |
|                                          | ODIN [24]                 | 84.66        | 67.26        | 91.38        |
|                                          | Mahalanobis [23]          | 57.52        | 86.01        | 96.68        |
|                                          | OE [15]                   | 65.91        | 86.66        | 97.09        |
|                                          | Energy fine-tuning (ours) | <b>28.97</b> | <b>95.40</b> | <b>99.05</b> |
| <b>Places365</b>                         | Softmax score [14]        | 82.84        | 73.78        | 93.29        |
|                                          | Energy score (ours)       | 80.56        | 75.44        | 93.45        |
|                                          | ODIN [24]                 | 87.88        | 71.63        | 92.56        |
|                                          | Mahalanobis [23]          | 88.83        | 67.87        | 90.71        |
|                                          | OE [15]                   | 57.92        | 85.78        | 96.56        |
|                                          | Energy fine-tuning (ours) | <b>51.23</b> | <b>89.71</b> | <b>97.63</b> |
| <b>LSUN-C</b>                            | Softmax score [14]        | 66.54        | 83.79        | 96.35        |
|                                          | Energy score (ours)       | 35.32        | 93.53        | 98.62        |
|                                          | ODIN [24]                 | 55.55        | 87.73        | 97.22        |
|                                          | Mahalanobis [23]          | 91.18        | 69.69        | 92.27        |
|                                          | OE [15]                   | 21.92        | 95.81        | 99.08        |
|                                          | Energy fine-tuning (ours) | <b>16.04</b> | <b>96.97</b> | <b>99.34</b> |
| <b>LSUN Resize</b>                       | Softmax score [14]        | 82.42        | 75.38        | 94.06        |
|                                          | Energy score (ours)       | 79.47        | 79.23        | 94.96        |
|                                          | ODIN [24]                 | 71.96        | 81.82        | 95.65        |
|                                          | Mahalanobis [23]          | <b>21.23</b> | <b>96.00</b> | <b>99.13</b> |
|                                          | OE [15]                   | 69.36        | 79.71        | 94.92        |
|                                          | Energy fine-tuning (ours) | 64.83        | 81.95        | 95.25        |
| <b>iSUN</b>                              | Softmax score [14]        | 82.80        | 75.46        | 94.06        |
|                                          | Energy score (ours)       | 81.04        | 78.91        | 94.91        |
|                                          | ODIN [24]                 | 68.51        | 82.69        | 95.80        |
|                                          | Mahalanobis [23]          | <b>26.10</b> | <b>94.58</b> | <b>98.72</b> |
|                                          | OE [15]                   | 72.39        | 78.61        | 94.58        |
|                                          | Energy fine-tuning (ours) | 67.23        | 79.36        | 94.37        |

Table 5: OOD Detection performance of CIFAR-100 as in-distribution for each specific dataset. The Mahalanobis scores are calculated from the features of the second-to-last layer. **Bold** numbers are superior results.

**Energy Bound Parameters** The optimal  $m_{\text{in}}$  is  $-23$  for CIFAR-10 and  $-27$  for CIFAR-100. The optimal  $m_{\text{out}}$  is  $-5$  for both CIFAR-10 and CIFAR-100.

| $\mathcal{D}_{in}^{test}$                   | fine-tune? | OOD dataset<br>$\mathcal{D}_{out}^{test}$ | FPR95<br>↓           | AUROC<br>↑           | AUPR<br>↑                   |
|---------------------------------------------|------------|-------------------------------------------|----------------------|----------------------|-----------------------------|
| Softmax score [14] / Energy score (ours)    |            |                                           |                      |                      |                             |
| WideResNet<br>SVHN                          | ✗          | iSUN                                      | 17.63 / <b>8.30</b>  | 97.27 / <b>98.26</b> | 99.47 / <b>99.66</b>        |
|                                             |            | Places365                                 | 19.26 / <b>9.55</b>  | 97.02 / <b>98.15</b> | 99.40 / <b>99.63</b>        |
|                                             |            | Texture                                   | 24.32 / <b>17.92</b> | 95.64 / <b>96.17</b> | 98.96 / <b>99.00</b>        |
|                                             |            | CIFAR-10                                  | 18.77 / <b>9.13</b>  | 97.10 / <b>98.23</b> | 99.43 / <b>99.65</b>        |
|                                             |            | LSUN-Crop                                 | 31.60 / <b>26.02</b> | 94.40 / <b>94.59</b> | <b>98.79</b> / 98.75        |
|                                             |            | LSUN-Resize                               | 23.57 / <b>12.03</b> | 96.55 / <b>97.69</b> | 99.32 / <b>99.54</b>        |
|                                             |            | <b>average</b>                            | 22.52 / <b>13.83</b> | 96.33 / <b>97.18</b> | 99.23 / <b>99.37</b>        |
| OE fine-tune [15] / Energy fine-tune (ours) |            |                                           |                      |                      |                             |
| WideResNet<br>SVHN                          | ✓          | iSUN                                      | 0.56 / <b>0.01</b>   | 99.82 / <b>99.99</b> | 99.96 / <b>100.00</b>       |
|                                             |            | Places365                                 | 2.65 / <b>0.36</b>   | 99.43 / <b>99.88</b> | 99.89 / <b>99.97</b>        |
|                                             |            | Texture                                   | 7.29 / <b>3.89</b>   | 98.60 / <b>99.20</b> | 99.69 / <b>99.82</b>        |
|                                             |            | CIFAR-10                                  | 2.14 / <b>0.17</b>   | 99.50 / <b>99.90</b> | <b>99.90</b> / <b>99.98</b> |
|                                             |            | LSUN-Crop                                 | 10.93 / <b>10.26</b> | 97.96 / <b>97.82</b> | <b>99.56</b> / 99.46        |
|                                             |            | LSUN-Resize                               | 0.63 / <b>0.00</b>   | 99.82 / <b>99.99</b> | 99.96 / <b>100.00</b>       |
|                                             |            | <b>average</b>                            | 4.03 / <b>2.45</b>   | 99.19 / <b>99.46</b> | 99.83 / <b>99.87</b>        |

Table 6: OOD detection performance comparison using softmax-based vs. energy-based approaches. We use WideResNet [43] to train on the in-distribution dataset SVHN with its training set only. We show results for both using the pretrained model (top) and applying fine-tuning (bottom). All values are percentages. ↑ indicates larger values are better, and ↓ indicates smaller values are better. **Bold** numbers are superior results.

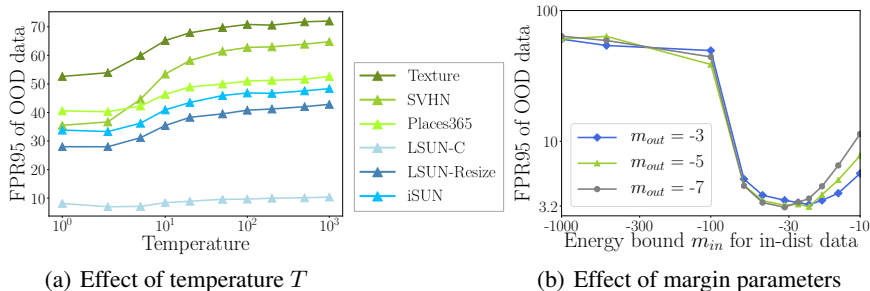

Figure 4: (a) We show the effect of  $T$  on a CIFAR-10 pre-trained WideResNet. The FPR (at 95% TPR) increases with larger  $T$ . (b) Effect of margin parameters  $m_{in}$  and  $m_{out}$  during energy fine-tuning (WideResNet). The x-axes are on a log scale.
